# Supplementary material for: Acyl-CoA synthetase-4, a new regulator of mTOR and a potential therapeutic target for enhanced estrogen receptor function in receptor-positive and -negative breast cancer
Source: PubMed Central journal article supplement (PMC4767459; doi:10.18632/oncotarget.5822), 2015-10-19
Supplement: oncotarget-06-42632-s001.pdf [file oncotarget-06-42632-s001.pdf]

## SUPPLEMENTARY TABLES

Supplementary Table S1: ACSL4-regulated genes related to the mTOR pathway

| Gene Symbol | Gene Name                                                     |
|-------------|---------------------------------------------------------------|
| RPS25       | ribosomal protein S25                                         |
| RPTOR       | regulatory associated protein of MTOR, complex 1              |
| RPS3A       | ribosomal protein S3A                                         |
| RPS6        | ribosomal protein S6                                          |
| RPS16       | ribosomal protein S16                                         |
| RPS28       | ribosomal protein S28                                         |
| MTOR        | mechanistic target of rapamycin (serine/threonine kinase)     |
| RPS9        | ribosomal protein S9                                          |
| AKT1        | v-akt murine thymoma viral oncogene homolog 1                 |
| EIF4G3      | eukaryotic translation initiation factor 4 gamma, 3           |
| EIF4EBP1    | eukaryotic translation initiation factor 4E binding protein 1 |
| NAPEPLD     | N-acyl phosphatidylethanolamine phospholipase D               |
| RHOV        | ras homolog family member V                                   |
| EIF3H       | eukaryotic translation initiation factor 3, subunit H         |
| PLD1        | phospholipase D1, phosphatidylcholine-specific                |
| RPS2        | ribosomal protein S2                                          |
| EIF3I       | eukaryotic translation initiation factor 3, subunit I         |
| EIF4A2      | eukaryotic translation initiation factor 4A2                  |
| RPS20       | ribosomal protein S20                                         |
| MAPK1       | mitogen-activated protein kinase 1                            |
| PPP2R5D     | protein phosphatase 2, regulatory subunit B', delta           |
| RHOB        | ras homolog family member B                                   |
| FKBP1A      | FK506 binding protein 1A, 12kDa                               |
| RHOA        | ras homolog family member A                                   |
| ULK1        | unc-51-like kinase 1 (C. elegans)                             |
| EIF3G       | eukaryotic translation initiation factor 3, subunit G         |
| RPS18       | ribosomal protein S18                                         |
| EIF3F       | eukaryotic translation initiation factor 3, subunit F         |
| RPS26       | ribosomal protein S26                                         |
| RPS10       | ribosomal protein S10                                         |
| TSC1        | tuberous sclerosis 1                                          |
| PRKCD       | protein kinase C, delta                                       |
| HRAS        | v-Ha-ras Harvey rat sarcoma viral oncogene homolog            |
| RPS23       | ribosomal protein S23                                         |

(Continued)

| Gene Symbol | Gene Name                                                    |
|-------------|--------------------------------------------------------------|
| RPS19       | ribosomal protein S19                                        |
| RPS12       | ribosomal protein S12                                        |
| RHEB        | Ras homolog enriched in brain                                |
| RHOU        | ras homolog family member U                                  |
| RPSA        | ribosomal protein SA                                         |
| ATG13       | autophagy related 13                                         |
| PRKAA1      | protein kinase, AMP-activated, alpha 1 catalytic subunit     |
| PRKAB1      | protein kinase, AMP-activated, beta 1 non-catalytic subunit  |
| STK11       | serine/threonine kinase 11                                   |
| INSR        | insulin receptor                                             |
| PPP2R4      | protein phosphatase 2A activator, regulatory subunit 4       |
| VEGFA       | vascular endothelial growth factor A                         |
| PIK3C3      | phosphatidylinositol 3-kinase, catalytic subunit type 3      |
| EIF3A       | eukaryotic translation initiation factor 3, subunit A        |
| EIF3L       | eukaryotic translation initiation factor 3, subunit L        |
| AKT2        | v-akt murine thymoma viral oncogene homolog 2                |
| EIF3J       | eukaryotic translation initiation factor 3, subunit J        |
| PPP2R2A     | protein phosphatase 2, regulatory subunit B, alpha           |
| RHOQ        | ras homolog family member Q                                  |
| PPP2R5A     | protein phosphatase 2, regulatory subunit B', alpha          |
| PRKD1       | protein kinase D1                                            |
| RPS4X       | ribosomal protein S4, X-linked                               |
| DGKZ        | diacylglycerol kinase, zeta                                  |
| RHOG        | ras homolog family member G                                  |
| RPS8        | ribosomal protein S8                                         |
| EIF3M       | eukaryotic translation initiation factor 3, subunit M        |
| IRS1        | insulin receptor substrate 1                                 |
| PRKCZ       | protein kinase C, zeta                                       |
| PRKAG2      | protein kinase, AMP-activated, gamma 2 non-catalytic subunit |
| RPS3        | ribosomal protein S3                                         |
| RPS27A      | ribosomal protein S27a                                       |
| EIF4A1      | eukaryotic translation initiation factor 4A1                 |
| AKT1S1      | AKT1 substrate 1 (proline-rich)                              |
| EIF4A3      | eukaryotic translation initiation factor 4A3                 |
| MAPKAP1     | mitogen-activated protein kinase associated protein 1        |
| PLD2        | phospholipase D2                                             |
| PIK3R2      | phosphoinositide-3-kinase, regulatory subunit 2 (beta)       |

(Continued)

| Gene Symbol | Gene Name                                                                |
|-------------|--------------------------------------------------------------------------|
| RPS14       | ribosomal protein S14                                                    |
| RPS21       | ribosomal protein S21                                                    |
| RPS6KA1     | ribosomal protein S6 kinase, 90kDa, polypeptide 1                        |
| RPS5        | ribosomal protein S5                                                     |
| PIK3CA      | phosphatidylinositol-4,5-bisphosphate 3-kinase, catalytic subunit alpha  |
| RHOF        | ras homolog family member F (in filopodia)                               |
| EIF3D       | eukaryotic translation initiation factor 3, subunit D                    |
| PLD6        | phospholipase D family, member 6                                         |
| PIK3C2B     | phosphatidylinositol-4-phosphate 3-kinase, catalytic subunit type 2 beta |
| PIK3R3      | phosphoinositide-3-kinase, regulatory subunit 3 (gamma)                  |
| RPS6KB1     | ribosomal protein S6 kinase, 70kDa, polypeptide 1                        |
| RPS7        | ribosomal protein S7                                                     |
| PRKD3       | protein kinase D3                                                        |
| RRAS        | related RAS viral (r-ras) oncogene homolog                               |
| TSC2        | tuberous sclerosis 2                                                     |
| PRR5L       | proline rich 5 like                                                      |
| DDIT4       | DNA-damage-inducible transcript 4                                        |
| EIF3E       | eukaryotic translation initiation factor 3, subunit E                    |
| EIF4B       | eukaryotic translation initiation factor 4B                              |
| RPS27       | ribosomal protein S27                                                    |
| RPS24       | ribosomal protein S24                                                    |
| RHOT1       | ras homolog family member T1                                             |
| RPS15       | ribosomal protein S15                                                    |

**Supplementary Table S2: ACSL4-regulated genes related to the eIF4 and p70S6K signaling**

| Gene Symbol | Gene Name                                                            |
|-------------|----------------------------------------------------------------------|
| RPS11       | ribosomal protein S11                                                |
| RPS25       | ribosomal protein S25                                                |
| EIF1        | eukaryotic translation initiation factor 1                           |
| RPS3A       | ribosomal protein S3A                                                |
| ITGA3       | integrin, alpha 3 (antigen CD49C, alpha 3 subunit of VLA-3 receptor) |
| RPS6        | ribosomal protein S6                                                 |
| RPS16       | ribosomal protein S16                                                |
| RPS28       | ribosomal protein S28                                                |
| MTOR        | mechanistic target of rapamycin (serine/threonine kinase)            |
| RPS9        | ribosomal protein S9                                                 |
| EIF2S1      | eukaryotic translation initiation factor 2, subunit 1 alpha, 35kDa   |
| ITGA5       | integrin, alpha 5 (fibronectin receptor, alpha polypeptide)          |
| AKT1        | v-akt murine thymoma viral oncogene homolog 1                        |
| EIF4EBP1    | eukaryotic translation initiation factor 4E binding protein 1        |
| EIF4G3      | eukaryotic translation initiation factor 4 gamma, 3                  |
| EIF4EBP2    | eukaryotic translation initiation factor 4E binding protein 2        |
| EIF3H       | eukaryotic translation initiation factor 3, subunit H                |
| RPS2        | ribosomal protein S2                                                 |
| EIF3I       | eukaryotic translation initiation factor 3, subunit I                |
| EIF4A2      | eukaryotic translation initiation factor 4A2                         |
| RPS20       | ribosomal protein S20                                                |
| MAPK1       | mitogen-activated protein kinase 1                                   |
| PABPC1      | poly(A) binding protein, cytoplasmic 1                               |
| PPP2R5D     | protein phosphatase 2, regulatory subunit B', delta                  |
| EIF1AX      | eukaryotic translation initiation factor 1A, X-linked                |
| EIF3G       | eukaryotic translation initiation factor 3, subunit G                |
| RPS18       | ribosomal protein S18                                                |
| MAPK14      | mitogen-activated protein kinase 14                                  |
| EIF3F       | eukaryotic translation initiation factor 3, subunit F                |
| SOS1        | son of sevenless homolog 1 (Drosophila)                              |
| RPS26       | ribosomal protein S26                                                |
| RPS10       | ribosomal protein S10                                                |
| PAIP2       | poly(A) binding protein interacting protein 2                        |
| HRAS        | v-Ha-ras Harvey rat sarcoma viral oncogene homolog                   |
| RPS23       | ribosomal protein S23                                                |
| RPS19       | ribosomal protein S19                                                |

(Continued)

| Gene Symbol | Gene Name                                                                |
|-------------|--------------------------------------------------------------------------|
| RPS12       | ribosomal protein S12                                                    |
| EIF2B2      | eukaryotic translation initiation factor 2B, subunit 2 beta, 39kDa       |
| EIF2S3      | eukaryotic translation initiation factor 2, subunit 3 gamma, 52kDa       |
| RPSA        | ribosomal protein SA                                                     |
| PAIP1       | poly(A) binding protein interacting protein 1                            |
| PPP2R4      | protein phosphatase 2A activator, regulatory subunit 4                   |
| PIK3C3      | phosphatidylinositol 3-kinase, catalytic subunit type 3                  |
| EIF3A       | eukaryotic translation initiation factor 3, subunit A                    |
| EIF3L       | eukaryotic translation initiation factor 3, subunit L                    |
| ITGA2       | integrin, alpha 2 (CD49B, alpha 2 subunit of VLA-2 receptor)             |
| AKT2        | v-akt murine thymoma viral oncogene homolog 2                            |
| EIF3J       | eukaryotic translation initiation factor 3, subunit J                    |
| PPP2R2A     | protein phosphatase 2, regulatory subunit B, alpha                       |
| PPP2R5A     | protein phosphatase 2, regulatory subunit B', alpha                      |
| RPS4X       | ribosomal protein S4, X-linked                                           |
| RPS8        | ribosomal protein S8                                                     |
| EIF3M       | eukaryotic translation initiation factor 3, subunit M                    |
| IRS1        | insulin receptor substrate 1                                             |
| PRKCZ       | protein kinase C, zeta                                                   |
| EIF2B4      | eukaryotic translation initiation factor 2B, subunit 4 delta, 67kDa      |
| RPS27A      | ribosomal protein S27a                                                   |
| RPS3        | ribosomal protein S3                                                     |
| EIF4A1      | eukaryotic translation initiation factor 4A1                             |
| EIF4A3      | eukaryotic translation initiation factor 4A3                             |
| RPS14       | ribosomal protein S14                                                    |
| PIK3R2      | phosphoinositide-3-kinase, regulatory subunit 2 (beta)                   |
| RPS21       | ribosomal protein S21                                                    |
| RPS5        | ribosomal protein S5                                                     |
| PIK3CA      | phosphatidylinositol-4,5-bisphosphate 3-kinase, catalytic subunit alpha  |
| EIF3D       | eukaryotic translation initiation factor 3, subunit D                    |
| PIK3C2B     | phosphatidylinositol-4-phosphate 3-kinase, catalytic subunit type 2 beta |
| EIF2B1      | eukaryotic translation initiation factor 2B, subunit 1 alpha, 26kDa      |
| PIK3R3      | phosphoinositide-3-kinase, regulatory subunit 3 (gamma)                  |
| RPS7        | ribosomal protein S7                                                     |
| RPS6KB1     | ribosomal protein S6 kinase, 70kDa, polypeptide 1                        |
| RRAS        | related RAS viral (r-ras) oncogene homolog                               |
| EIF3E       | eukaryotic translation initiation factor 3, subunit E                    |

(Continued)

| <b>Gene Symbol</b> | <b>Gene Name</b>                       |
|--------------------|----------------------------------------|
| MAPK11             | mitogen-activated protein kinase 11    |
| RPS27              | ribosomal protein S27                  |
| RPS24              | ribosomal protein S24                  |
| RPS15              | ribosomal protein S15                  |
| GRB2               | growth factor receptor-bound protein 2 |

**Supplementary Table S3: List of antibodies used in RPPA**

| Official Antibody Name | Gene Name      |
|------------------------|----------------|
| 14-3-3-beta-R-V        | YWHAB          |
| 14-3-3-epsilon-M-C     | YWHAE          |
| 14-3-3-zeta-R-V        | YWHAZ          |
| 4E-BP1-R-V             | EIF4EBP1       |
| 4E-BP1_pS65-R-V        | EIF4EBP1       |
| 4E-BP1_pT37_T46-R-V    | EIF4EBP1       |
| 53BP1-R-V              | TP53BP1        |
| A-Raf-R-V              | ARAF           |
| ACC_pS79-R-V           | ACACA ACACB    |
| ACC1-R-E               | ACACA          |
| ACVRL1-R-C             | ACVRL1         |
| ADAR1-M-V              | ADAR           |
| Akt-R-V                | AKT1 AKT2 AKT3 |
| Akt_pS473-R-V          | AKT1 AKT2 AKT3 |
| Akt_pT308-R-V          | AKT1 AKT2 AKT3 |
| AMPK-alpha-R-C         | PRKAA1         |
| AMPK-alpha_pT172-R-V   | PRKAA1         |
| Annexin-I-M-V          | ANXA1          |
| Annexin-VII-M-V        | ANXA7          |
| AR-R-V                 | AR             |
| ARHI-M-C               | DIRAS3         |
| ATM-R-V                | ATM            |
| ATM_pS1981-R-V         | ATM            |
| ATP5H-M-C              | ATP5H          |
| ATR-R-C                | ATR            |
| b-Catenin-R-V          | CTNNB1         |
| b-Catenin_pT41_S45-R-V | CTNNB1         |
| B-Raf-M-C              | BRAF           |
| B-Raf_pS445-R-V        | BRAF           |
| Bad_pS112-R-V          | BAD            |
| Bak-R-C                | BAK1           |
| BAP1-M-V               | BAP1           |
| Bax-R-V                | BAX            |
| Bcl-xL-R-V             | BCL2L1         |
| Bcl2-M-V               | BCL2           |
| Beclin-G-C             | BECN1          |

(Continued)

| Official Antibody Name | Gene Name |
|------------------------|-----------|
| Bid-R-C                | BID       |
| Bim-R-V                | BCL2L11   |
| BRCA2-R-C              | BRCA2     |
| c-Jun_pS73-R-V         | JUN       |
| c-Kit-R-V              | KIT       |
| c-Met-M-QC             | MET       |
| c-Met_pY1234_Y1235-R-V | MET       |
| c-Myc-R-C              | MYC       |
| C-Raf-R-V              | RAF1      |
| C-Raf_pS338-R-V        | RAF1      |
| Caspase-7-cleaved-R-C  | CASP7     |
| Caspase-8-M-QC         | CASP8     |
| Caveolin-1-R-V         | CAV1      |
| CD29-M-V               | ITGB1     |
| CD31-M-V               | PECAM1    |
| CD49b-M-V              | ITGA2     |
| CDK1-R-V               | CDC2-CDK1 |
| Chk1-M-C               | CHEK1     |
| Chk1_pS345-R-C         | CHEK1     |
| Chk2-M-V               | CHEK2     |
| Chk2_pT68-R-C          | CHEK2     |
| Claudin-7-R-V          | CLDN7     |
| Collagen-VI-R-V        | COL6A1    |
| Complex-II-Subunit-M-V | SDHA      |
| Cox-IV-M-C             | COX4I1    |
| Cox2-R-C               | PTGS2     |
| Cyclin-B1-R-V          | CCNB1     |
| Cyclin-D1-R-V          | CCND1     |
| Cyclin-E1-M-V          | CCNE1     |
| Cyclophilin-F-M-V      | PPIF      |
| DJ1-R-V                | PARK7     |
| Dvl3-R-V               | DVL3      |
| E-Cadherin-R-V         | CDH1      |
| E2F1-M-V               | E2F1      |
| eEF2-R-C               | EEF2      |
| eEF2K-R-V              | EEF2K     |
| EGFR-R-V               | EGFR      |

(Continued)



| Official Antibody Name | Gene Name   |
|------------------------|-------------|
| EGFR_pY1068-R-C        | EGFR        |
| EGFR_pY1173-R-V        | EGFR        |
| eIF4E-R-V              | EIF4E       |
| eIF4G-R-C              | EIF4G1      |
| ER-alpha-R-V           | ESR1        |
| ER-alpha_pS118-R-V     | ESR1        |
| ERCC1-M-V              | ERCC1       |
| Ets-1-R-V              | ETS1        |
| FAK-R-E                | PTK2        |
| FAK_pY397-R-V          | PTK2        |
| FASN-R-V               | FASN        |
| Fibronectin-R-V        | FN1         |
| FoxM1-R-V              | FOXO1       |
| FoxO3a-R-C             | FOXO3       |
| FoxO3a_pS318_S321-R-C  | FOXO3       |
| G6PD-M-V               | G6PD        |
| Gab2-R-V               | GAB2        |
| GAPDH-M-C              | GAPDH       |
| GATA3-M-V              | GATA3       |
| GCN5L2-R-V             | KAT2A       |
| GPBB-R-V               | PYGB        |
| GSK-3ab-M-V            | GSK3A GSK3B |
| GSK-3ab_pS21_S9-R-V    | GSK3A GSK3B |
| GSK-3b_pS9-R-V         | GSK3B       |
| Gys-R-V                | GYS1        |
| Gys_pS641-R-V          | GYS1        |
| HER2-M-V               | ERBB2       |
| HER2_pY1248-R-C        | ERBB2       |
| HER3-R-V               | ERBB3       |
| HER3_pY1289-R-C        | ERBB3       |
| Heregulin-R-V          | NRG1        |
| HIAP-R-C               | BIRC2       |
| Histone-H3-R-V         | H3F3A H3F3B |
| IGF1R-beta-R-V         | IGF1R       |
| IGFBP2-R-V             | IGFBP2      |
| INPP4b-R-V             | INPP4B      |
| IRS1-R-V               | IRS1        |

(Continued)

| Official Antibody Name | Gene Name     |
|------------------------|---------------|
| JAB1-M-C               | COP5          |
| JNK_pT183_Y185-R-V     | MAPK8         |
| JNK2-R-C               | MAPK9         |
| Lck-R-V                | LCK           |
| MAPK_pT202_Y204-R-V    | MAPK1 MAPK3   |
| Mcl-1-R-V              | MCL1          |
| MDM2_pS166-R-V         | MDM2          |
| MEK1-R-V               | MAP2K1        |
| MEK1_pS217_S221-R-V    | MAP2K1 MAP2K2 |
| MEK2-R-V               | MAP2K2        |
| Merlin-R-C             | NF2           |
| MIG6-M-V               | ERRFI1        |
| MSH2-M-V               | MSH2          |
| MSH6-R-C               | MSH6          |
| mTOR-R-V               | MTOR          |
| mTOR_pS2448-R-C        | MTOR          |
| Myosin-11-R-V          | MYH11         |
| Myosin-IIa_pS1943-R-V  | MYH9          |
| N-Cadherin-R-V         | CDH2          |
| N-Ras-M-V              | NRAS          |
| NAPSIN-A-R-C           | NAPSA         |
| NDRG1_pT346-R-V        | NDRG1         |
| NF-kB-p65_pS536-R-C    | RELA          |
| Notch1-R-V             | NOTCH1        |
| p16INK4a-R-V           | CDKN2A        |
| p21-R-V                | CDKN1A        |
| p27-Kip-1-R-V          | CDKN1B        |
| p27_pT157-R-C          | CDKN1B        |
| p27_pT198-R-V          | CDKN1B        |
| p38-alpha-M-V          | MAPK14        |
| p38-R-V                | MAPK14        |
| p38_pT180_Y182-R-V     | MAPK14        |
| p53-R-C                | TP53          |
| p70-S6K_pT389-R-V      | RPS6KB1       |
| p70-S6K1-R-V           | RPS6KB1       |
| PAI-1-M-V              | SERPINE1      |
| PARP-cleaved-M-QC      | PARP1         |

(Continued)

| Official Antibody Name | Gene Name                           |
|------------------------|-------------------------------------|
| PARP1-R-V              | PARP1                               |
| Paxillin-R-C           | PXN                                 |
| PCNA-M-C               | PCNA                                |
| Pdcd1L1-G-C            | CD274                               |
| Pdcd4-R-C              | PDCD4                               |
| PDGFR-beta-R-V         | PDGFRB                              |
| PDK1-R-V               | PDPK1                               |
| PDK1_pS241-R-V         | PDPK1                               |
| PEA-15-R-V             | PEA15                               |
| PEA-15_pS116-R-V       | PEA15                               |
| PI3K-p110-alpha-R-C    | PIK3CA                              |
| PI3K-p85-R-V           | PIK3R1                              |
| PKC-alpha-M-V          | PRKCA                               |
| PKC-alpha_pS657-R-C    | PRKCA                               |
| PKC-beta-II_pS660-R-V  | PRKCA PRKCB PRKCD PRKCE PRKCH PRKCQ |
| PKC-delta_pS664-R-V    | PRKCD                               |
| PMS2-R-V               | PMS2                                |
| Porin-M-V              | VDAC1                               |
| PR-R-V                 | PGR                                 |
| PRAS40_pT246-R-V       | AKT1S1                              |
| PREX1-R-V              | PREX1                               |
| PTEN-R-V               | PTEN                                |
| Rab11-R-E              | RAB11A RAB11B                       |
| Rab25-R-V              | RAB25                               |
| Rad50-M-V              | RAD50                               |
| Rad51-R-V              | RAD51                               |
| Raptor-R-V             | RPTOR                               |
| Rb-M-QC                | RB1                                 |
| Rb_pS807_S811-R-V      | RB1                                 |
| RBM15-R-V              | RBM15                               |
| Rictor-R-C             | RICTOR                              |
| Rictor_pT1135-R-V      | RICTOR                              |
| RSK-R-C                | RPS6KA1 RPS6KA2 RPS6KA3             |
| S6_pS235_S236-R-V      | RPS6                                |
| S6_pS240_S244-R-V      | RPS6                                |
| SCD-M-V                | SCD                                 |
| SETD2-R-QC             | SETD2                               |

(Continued)

| Official Antibody Name | Gene Name                |
|------------------------|--------------------------|
| SF2-M-V                | SRSF1                    |
| Shc_pY317-R-V          | SHC1                     |
| Smac-M-QC              | DIABLO                   |
| Smad1-R-V              | SMAD1                    |
| Smad3-R-V              | SMAD3                    |
| Smad4-M-V              | SMAD4                    |
| Snail-M-QC             | SNAI1                    |
| Src-M-V                | SRC                      |
| Src_pY416-R-C          | SRC LYN FYN LCK YES1 HCK |
| Src_pY527-R-V          | SRC YES1 FYN FGR         |
| Stat3_pY705-R-V        | STAT3                    |
| Stat5a-R-V             | STAT5A                   |
| Stathmin-1-R-V         | STMN1                    |
| Syk-M-V                | SYK                      |
| TAZ-R-V                | WWTR1                    |
| TFRC-R-V               | TFRC                     |
| TIGAR-R-V              | C12ORF5                  |
| Transglutaminase-M-V   | TGM2                     |
| TSC1-R-C               | TSC1                     |
| TTF1-R-V               | NKX2-1                   |
| Tuberin-R-V            | TSC2                     |
| Tuberin_pT1462-R-V     | TSC2                     |
| TWIST-M-C              | TWIST2                   |
| Tyro3-R-V              | TYRO3                    |
| UBAC1-R-V              | UBAC1                    |
| UGT1A-M-V              | UGT1A1                   |
| UQCRC2-M-C             | UQCRC2                   |
| VEGFR-2-R-V            | KDR                      |
| XRCC1-R-C              | XRCC1                    |
| YAP-R-E                | YAP1                     |
| YAP_pS127-R-E          | YAP1                     |
| YB1-R-V                | YBX1                     |
| YB1_pS102-R-V          | YBX1                     |
